# Supplementary material for: The Combination of Patient-Reported Clinical Symptoms and an Endoscopic Score Correlates Well with Health-Related Quality of Life in Patients with Ulcerative Colitis
Source: PubMed Central journal article supplement (PMC6723355; doi:10.3390/jcm8081171), 2019-08-05
Supplement: jcm-08-01171-s001.pdf [file jcm-08-01171-s001.pdf]

**Supplementary table 1:** Patient-reported clinical outcomes using the 6-point partial Mayo score

Circle one number which indicates your symptoms in the **past 7 days**

| <b>Rectal bleeding</b> |                        |
|------------------------|------------------------|
| <b>0</b>               | no blood seen          |
| <b>1</b>               | streaks of blood < 50% |
| <b>2</b>               | obvious blood > 50%    |
| <b>3</b>               | blood passes alone     |

| <b>Stool frequency</b> |                                         |
|------------------------|-----------------------------------------|
| <b>0</b>               | normal                                  |
| <b>1</b>               | 1-2 per day more than normal            |
| <b>2</b>               | 3-4 per day more than normal            |
| <b>3</b>               | 5 <sup>+</sup> per day more than normal |

**Supplementary table 2: Short Inflammatory Bowel Disease Questionnaire (SIBDQ)**

Circle a number which indicates how you have been feeling during **the last 2 weeks**.

1. How often has **the feeling of fatigue or being tired and worn out** been a problem for you during the past 2 weeks?

|                 |                  |                        |                  |                      |                        |                  |
|-----------------|------------------|------------------------|------------------|----------------------|------------------------|------------------|
| <b>1</b>        | <b>2</b>         | <b>3</b>               | <b>4</b>         | <b>5</b>             | <b>6</b>               | <b>7</b>         |
| All of the time | Most of the time | A good bit of the time | Some of the time | A little of the time | Hardly any of the time | None of the time |

2. How often during the last 2 weeks have you **delayed or canceled a social engagement** because of your bowel problem?

|                 |                  |                        |                  |                      |                        |                  |
|-----------------|------------------|------------------------|------------------|----------------------|------------------------|------------------|
| <b>1</b>        | <b>2</b>         | <b>3</b>               | <b>4</b>         | <b>5</b>             | <b>6</b>               | <b>7</b>         |
| All of the time | Most of the time | A good bit of the time | Some of the time | A little of the time | Hardly any of the time | None of the time |

3. As a result of your bowel problems, how much difficulty did you experience **doing leisure or sports activities** you would like to have done during the past 2 weeks?

|                            |                     |                          |                 |                     |                       |               |
|----------------------------|---------------------|--------------------------|-----------------|---------------------|-----------------------|---------------|
| <b>1</b>                   | <b>2</b>            | <b>3</b>                 | <b>4</b>        | <b>5</b>            | <b>6</b>              | <b>7</b>      |
| A great deal of difficulty | A lot of difficulty | A fair bit of difficulty | Some difficulty | A little difficulty | Hardly any difficulty | No difficulty |

4. How often during the past 2 weeks have you been **troubled by pain in the abdomen**?

|                 |                  |                        |                  |                      |                        |                  |
|-----------------|------------------|------------------------|------------------|----------------------|------------------------|------------------|
| <b>1</b>        | <b>2</b>         | <b>3</b>               | <b>4</b>         | <b>5</b>             | <b>6</b>               | <b>7</b>         |
| All of the time | Most of the time | A good bit of the time | Some of the time | A little of the time | Hardly any of the time | None of the time |

5. How often during the past 2 weeks have you **felt depressed or discouraged**?

|                 |                  |                        |                  |                      |                        |                  |
|-----------------|------------------|------------------------|------------------|----------------------|------------------------|------------------|
| <b>1</b>        | <b>2</b>         | <b>3</b>               | <b>4</b>         | <b>5</b>             | <b>6</b>               | <b>7</b>         |
| All of the time | Most of the time | A good bit of the time | Some of the time | A little of the time | Hardly any of the time | None of the time |

6. Overall, in the past 2 weeks, how much of a problem have you had with **passing large amounts of gas?**

|               |               |                       |              |                  |                    |            |
|---------------|---------------|-----------------------|--------------|------------------|--------------------|------------|
| <b>1</b>      | <b>2</b>      | <b>3</b>              | <b>4</b>     | <b>5</b>         | <b>6</b>           | <b>7</b>   |
| Major problem | A big problem | A significant problem | Some problem | A little trouble | Hardly any trouble | No trouble |

7. Overall, in the past 2 weeks, how much of a problem have you had **maintaining or getting to the weight** you would like to be?

|               |               |                       |              |                  |                    |            |
|---------------|---------------|-----------------------|--------------|------------------|--------------------|------------|
| <b>1</b>      | <b>2</b>      | <b>3</b>              | <b>4</b>     | <b>5</b>         | <b>6</b>           | <b>7</b>   |
| Major problem | A big problem | A significant problem | Some problem | A little trouble | Hardly any trouble | No trouble |

8. How often during the past 2 weeks have you **felt relaxed and free of tension?**

|                  |                        |                      |                  |                        |                  |                 |
|------------------|------------------------|----------------------|------------------|------------------------|------------------|-----------------|
| <b>1</b>         | <b>2</b>               | <b>3</b>             | <b>4</b>         | <b>5</b>               | <b>6</b>         | <b>7</b>        |
| None of the time | Hardly any of the time | A little of the time | Some of the time | A good bit of the time | Most of the time | All of the time |

9. How much of the time during the past 2 weeks have you been troubled by **a feeling of having to go to the bathroom even though your bowels were empty?**

|                 |                  |                        |                  |                      |                        |                  |
|-----------------|------------------|------------------------|------------------|----------------------|------------------------|------------------|
| <b>1</b>        | <b>2</b>         | <b>3</b>               | <b>4</b>         | <b>5</b>             | <b>6</b>               | <b>7</b>         |
| All of the time | Most of the time | A good bit of the time | Some of the time | A little of the time | Hardly any of the time | None of the time |

10. How often during the past 2 weeks have you **felt angry as a result of your bowel problem?**

|                 |                  |                        |                  |                      |                        |                  |
|-----------------|------------------|------------------------|------------------|----------------------|------------------------|------------------|
| <b>1</b>        | <b>2</b>         | <b>3</b>               | <b>4</b>         | <b>5</b>             | <b>6</b>               | <b>7</b>         |
| All of the time | Most of the time | A good bit of the time | Some of the time | A little of the time | Hardly any of the time | None of the time |

**Supplementary table 3: European quality 5 dimensions 3 level questionnaire (EQ5D3L)**

By placing a tick in one box in each group below, please indicate

which statements best describe your own health state **today**.

|                                                                                                                                                                                                                                                                                                                                                       |
|-------------------------------------------------------------------------------------------------------------------------------------------------------------------------------------------------------------------------------------------------------------------------------------------------------------------------------------------------------|
| <p><b>Mobility</b></p> <p><input type="checkbox"/> I have no problems in walking about</p> <p><input type="checkbox"/> I have some problems in walking about</p> <p><input type="checkbox"/> I am confined to bed</p>                                                                                                                                 |
| <p><b>Self-Care</b></p> <p><input type="checkbox"/> I have no problems with self-care</p> <p><input type="checkbox"/> I have some problems washing or dressing myself</p> <p><input type="checkbox"/> I am unable to wash or dress myself</p>                                                                                                         |
| <p><b>Usual Activities</b> (e.g. work, study, housework, family or leisure activities)</p> <p><input type="checkbox"/> I have no problems with performing my usual activities</p> <p><input type="checkbox"/> I have some problems with performing my usual activities</p> <p><input type="checkbox"/> I am unable to perform my usual activities</p> |
| <p><b>Pain/Discomfort</b></p> <p><input type="checkbox"/> I have no pain or discomfort</p> <p><input type="checkbox"/> I have moderate pain or discomfort</p> <p><input type="checkbox"/> I have extreme pain or discomfort</p>                                                                                                                       |
| <p><b>Anxiety/Depression</b></p> <p><input type="checkbox"/> I am not anxious or depressed</p> <p><input type="checkbox"/> I am moderately anxious or depressed</p> <p><input type="checkbox"/> I am extremely anxious or depressed</p>                                                                                                               |

**Supplementary table 4: Work Productivity and Activity Impairment Questionnaire (WPAI)**

1. Are you **currently employed** (working for pay)?  NO  YES

*If NO, check "NO" and skip to question 6.*

The next questions are about the **past 7 days**, not including today.

2. During the past 7 days, **how many hours did you miss from work because of problems associated with your PROBLEM?** *Include hours you missed on sick days, times you went in late, left early, etc., because of your PROBLEM. Do not include time you missed to participate in this study.* \_\_\_\_\_ **HOURS**

3. During the past 7 days, **how many hours did you miss from work because of any other reason**, such as vacation, holidays; time off to participate in this study? \_\_\_\_\_ **HOURS**

4. During the past 7 days, **how many hours did you actually work?** \_\_\_\_\_ **HOURS** *(If "0", skip to question 6.)*

5. During the past 7 days, **how much did your PROBLEM affect your productivity while you were working?**

If PROBLEM affected your work only a little, choose a low number.

|                                               |                                 |                                                                     |
|-----------------------------------------------|---------------------------------|---------------------------------------------------------------------|
| PROBLEM had<br><b>no effect</b> on my<br>work | _____<br>0 1 2 3 4 5 6 7 8 9 10 | PROBLEM<br><b>completely</b><br><b>prevented me</b> from<br>working |
|-----------------------------------------------|---------------------------------|---------------------------------------------------------------------|

6. During the past 7 days, how much did **your PROBLEM affect your ability to do your regular daily activities, other than work at a job?**

If PROBLEM affected your activities only a little, choose a low number.

|                                                           |                                 |                                                                                       |
|-----------------------------------------------------------|---------------------------------|---------------------------------------------------------------------------------------|
| PROBLEM had<br><b>no effect</b> on my<br>daily activities | _____<br>0 1 2 3 4 5 6 7 8 9 10 | PROBLEM<br><b>completely prevented</b><br><b>me</b> from doing my<br>daily activities |
|-----------------------------------------------------------|---------------------------------|---------------------------------------------------------------------------------------|

**Supplementary table 5: Functional Assessment of Chronic Illness Therapy-Fatigue Scale**

(FACIT-F)

Below is a list of statements that other people with your illness have said are important.

Please circle or mark one number per line to indicate your response as it applies to **the past 7**

**days**

|                                                                     | Not at all | A little bit | Some-<br>what | Quite a<br>bit | Very<br>much |
|---------------------------------------------------------------------|------------|--------------|---------------|----------------|--------------|
| I feel fatigued.....                                                | 0          | 1            | 2             | 3              | 4            |
| I feel weak all over.....                                           | 0          | 1            | 2             | 3              | 4            |
| I feel listless (“washed out”).....                                 | 0          | 1            | 2             | 3              | 4            |
| I feel tired.....                                                   | 0          | 1            | 2             | 3              | 4            |
| I have trouble <u>starting</u> things because I am tired.....       | 0          | 1            | 2             | 3              | 4            |
| I have trouble <u>finishing</u> things because I am tired.....      | 0          | 1            | 2             | 3              | 4            |
| I have energy.....                                                  | 0          | 1            | 2             | 3              | 4            |
| I am able to do my usual activities.....                            | 0          | 1            | 2             | 3              | 4            |
| I need to sleep during the day.....                                 | 0          | 1            | 2             | 3              | 4            |
| I am too tired to eat.....                                          | 0          | 1            | 2             | 3              | 4            |
| I need help doing my usual activities.....                          | 0          | 1            | 2             | 3              | 4            |
| I am frustrated by being too tired to do the things I want to do... | 0          | 1            | 2             | 3              | 4            |
| I have to limit my social activity because I am tired.....          | 0          | 1            | 2             | 3              | 4            |

**Supplementary table 6: Hospital Anxiety and Depression Scale (HADS)**Please circle a number that is closest to how you have been feeling in **the past 7 days**.

|                                                                                    |   |                                                                              |   |
|------------------------------------------------------------------------------------|---|------------------------------------------------------------------------------|---|
| <b>I feel tense or 'wound up':</b>                                                 |   | <b>I feel as if I am slowed down:</b>                                        |   |
| Most of the time                                                                   | 3 | Nearly all of the time                                                       | 3 |
| A lot of the time                                                                  | 2 | Very often                                                                   | 2 |
| Time to time, occasionally                                                         | 1 | Sometimes                                                                    | 1 |
| Not at all                                                                         | 0 | Not at all                                                                   | 0 |
| <b>I still enjoy the things I used to enjoy:</b>                                   |   | <b>I get a sort of frightened feeling like 'butterflies in the stomach':</b> |   |
| Definitely as much                                                                 | 0 | Not at all                                                                   | 0 |
| Not quite so much                                                                  | 1 | Occasionally                                                                 | 1 |
| Only a little                                                                      | 2 | Quite often                                                                  | 2 |
| Not at all                                                                         | 3 | Very often                                                                   | 3 |
| <b>I get a sort of frightened feeling like something awful is about to happen:</b> |   | <b>I have lost interest in my appearance:</b>                                |   |
| Very definitely and quite badly                                                    | 3 | Definitely                                                                   | 3 |
| Yes, but not too badly                                                             | 2 | I don't take as much care as I should                                        | 2 |
| A little, but it doesn't worry me                                                  | 1 | I may not take quite as much care                                            | 1 |
| Not at all                                                                         | 0 | I take just as much care as ever                                             | 0 |
| <b>I can laugh and see the funny side of things:</b>                               |   | <b>I feel restless as if I have to be on the move:</b>                       |   |
| As much as I always could                                                          | 0 | Very much indeed                                                             | 3 |
| Not quite so much now                                                              | 1 | Quite a lot                                                                  | 2 |
| Definitely not so much now                                                         | 2 | Not very much                                                                | 1 |
| Not at all                                                                         | 3 | Not at all                                                                   | 0 |
| <b>Worrying thoughts go through my mind:</b>                                       |   | <b>I look forward with enjoyment to things:</b>                              |   |
| A great deal of the time                                                           | 3 | A much as I ever did                                                         | 0 |
| A lot of the time                                                                  | 2 | Rather less than I used to                                                   | 1 |
| From time to time but not too often                                                | 1 | Definitely less than I used to                                               | 2 |
| Only occasionally                                                                  | 0 | Hardly at all                                                                | 3 |
| <b>I feel cheerful:</b>                                                            |   | <b>I get sudden feelings of panic:</b>                                       |   |
| Not at all                                                                         | 3 | Very often indeed                                                            | 3 |
| Not often                                                                          | 2 | Quite often                                                                  | 2 |
| Sometimes                                                                          | 1 | Not very often                                                               | 1 |
| Most of the time                                                                   | 0 | Not at all                                                                   | 0 |
| <b>I can sit at ease and feel relaxed:</b>                                         |   | <b>I can enjoy a good book or radio or TV program:</b>                       |   |
| Definitely                                                                         | 0 | Often                                                                        | 0 |
| Usually                                                                            | 1 | Sometimes                                                                    | 1 |
| Not often                                                                          | 2 | Not often                                                                    | 2 |
| Not at all                                                                         | 3 | Very seldom                                                                  | 3 |
